# Supplementary material
Source: PubMed Central journal article supplement (PMC2277011)
Supplement: jphysiol_2007.134387_1.pdf [file jphysiol_2007.134387_1.pdf]

Table 1. Primers used for PCR reactions.

| Gene          | Primers                                                 | Position                   | Gene Bank Accession | Size (bp) |
|---------------|---------------------------------------------------------|----------------------------|---------------------|-----------|
| <i>KCNN1</i>  | F: ctgtgggaagggtgtgtctg<br>R: ccagaccaaggccgggttcgg     | (1131-1152)<br>(1351-1371) | AF357239            | 241       |
| <i>KCNN2</i>  | F: atgccccctccacaaccaccgc<br>R: acagccctggtgtagccctag   | (719-740)<br>(1141-1162)   | AF533008            | 444       |
| <i>KCNN3</i>  | F: caagaatgccgccaccaatgctc<br>R: gaaaagcagattggcagcctgg | (1752-1773)<br>(2005-2026) | AF357241            | 275       |
| <i>KCNMA1</i> | F: gtactttaggatttttcacgca<br>R: acctccccgaagctgatgagg   | (1775-1797)<br>(2146-2166) | NM_010610           | 392*      |
| <i>KCNMB1</i> | F: accaacagtgtcctatatac<br>R: tgttgagcttcacatggca       | (365-384)<br>(591-610)     | NM_031169           | 246       |
| <i>KCNMB4</i> | F: tccaggtgtacgtgaacaactccg<br>R: tgcttctctggccggtgtgg  | (256-279)<br>(519-540)     | XM_916312           | 285       |

\*The primers used for *KCNMA1* can detect also other 2 transcripts found in mice for this gene the AF465244 (392 bp) and MMU09383 (218 bp).
