# Supplementary material
Source: PubMed Central journal article supplement (PMC2277011)
Supplement: tjp0583-0705-SD2.pdf [file tjp0583-0705-SD2.pdf]

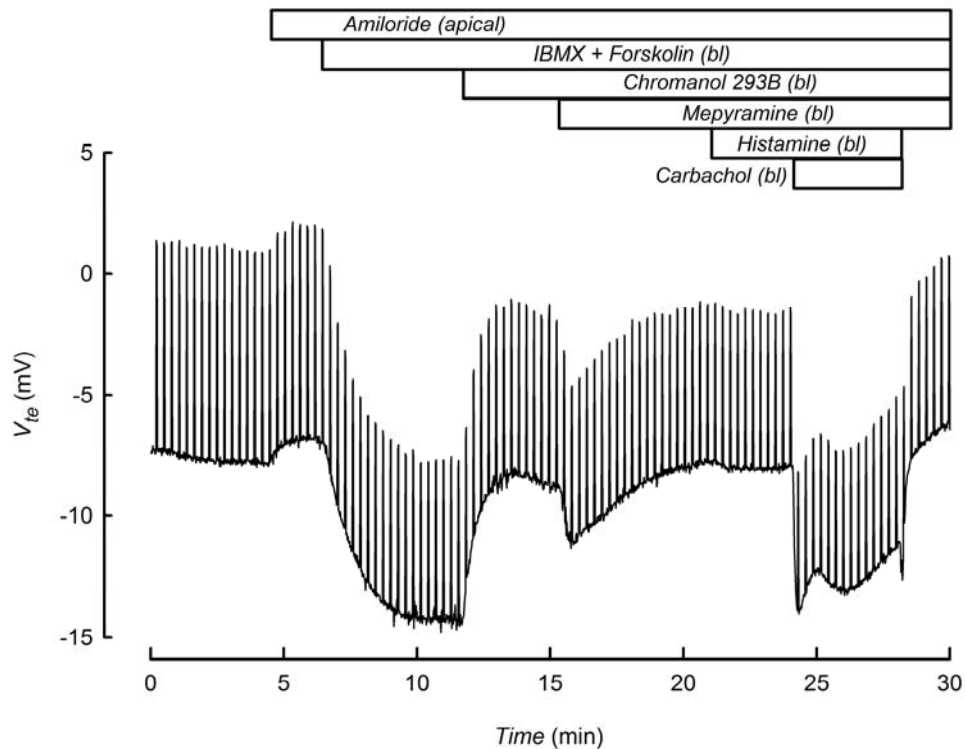

Suppl. Fig.1. Effect of the H1-receptor antagonist mepyramine on histamine-induced ionic secretion in wild-type mouse colon mucosa. The traces show a continuous recording of transepithelial potential ( $V_{te}$ ) as function of time obtained in Ussing chamber experiments of mouse distal colon. The voltage deflections are caused by current pulse injection. Addition of 100  $\mu$ M isobutylmethylxanthine (IBMX) plus 1  $\mu$ M forskolin induces a negative change in  $V_{te}$  that was fully reversed by 10  $\mu$ M chromanol 293B. Addition of 100  $\mu$ M mepyramine gave a transient negative change in  $V_{te}$ , after which there was no effect of basolateral addition of 150  $\mu$ M histamine. The specificity of mepyramine effect was tested by addition of 100  $\mu$ M carbachol which gave the expected anion secretory response. Apical amiloride at 10  $\mu$ M was used to inhibit ENaC-mediated sodium currents. Apical and bl indicate additions to the mucosal and serosal compartment, respectively. Tissue resistances were respectively 86 and 64  $\Omega \cdot \text{cm}^2$  at the beginning and end of the experiment. The effect of mepyramine abolishing all effect of histamine is typical of 6 experiments.
